# Supplementary material
Source: PubMed Central journal article supplement (PMC2899890)
Supplement: NIHMS214062-supplement-1_si_001.pdf [file NIHMS214062-supplement-1_si_001.pdf]

## SUPPORTING INFORMATION

### Knockdown of $\mu$ -calpain in Fanconi Anemia, FA-A, cells by siRNA Restores $\alpha$ II Spectrin levels and Corrects Chromosomal Instability and Defective DNA Interstrand Cross-link Repair

Pan Zhang, Deepa Sridharan, and Muriel W. Lambert

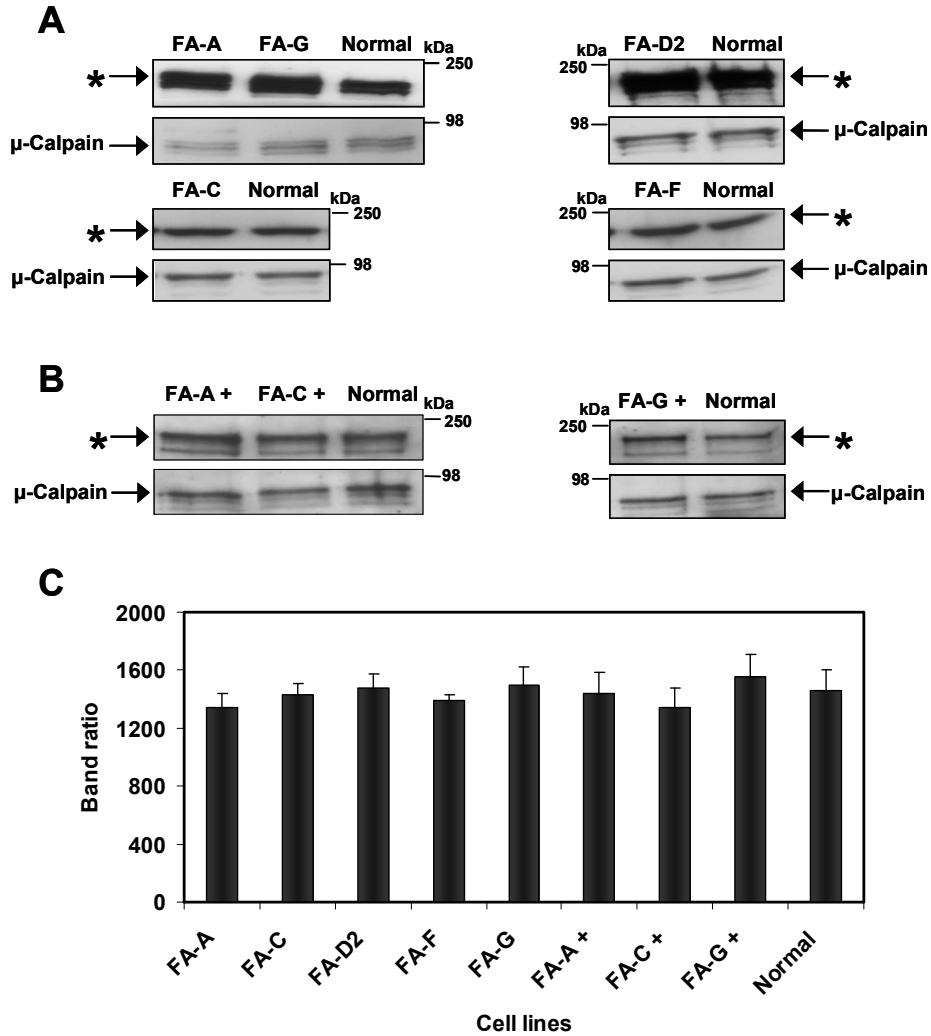

**FIGURE S1.** Levels of  $\mu$ -calpain protein in FA cells are the same as those in corrected FA cells and normal cells. Chromatin-associated protein extracts from (A) FA-A, FA-G, FA-C, FA-D2, and FA-F and (B) corrected FA-A+, FA-C+ and FA-G+ cells were examined for levels of  $\mu$ -calpain using western blot analysis and compared with  $\mu$ -calpain levels found in these extracts from normal cells. Blots were probed with anti- $\mu$ -calpain. Topoisomerase (\*) was used as a loading control. Molecular weight markers are as indicated. (C) These immunoblots were scanned and levels of  $\mu$ -calpain quantitated. Vertical lines represent  $\pm$  s.e.m. for 4-6 experiments.

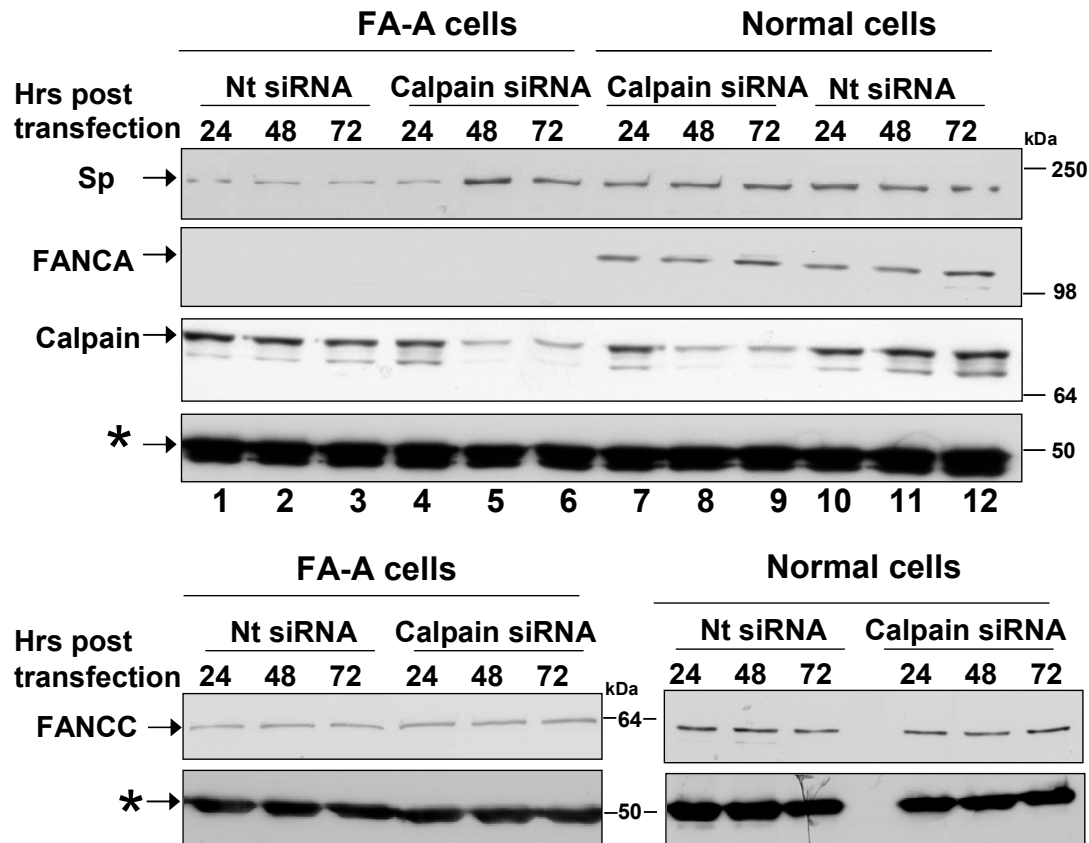

**FIGURE S2.** Knocking down  $\mu$ -calpain in FA-A cells by siRNA leads to restoration of levels of  $\alpha$ IISp to normal 48 hours post transfection and has no effect on levels of FANCA or FANCC. FA-A and normal cells were transiently transfected with 300 pM  $\mu$ -calpain siRNA or nontarget (Nt) siRNA. Levels of  $\alpha$ IISp,  $\mu$ -calpain, FANCA and FANCC in the FA-A and normal cells were examined by western blot analysis at 24, 48 and 72 hours post transfection. Immunoblots were probed with anti- $\alpha$ IISp, anti- $\mu$ -calpain, anti-FANCA, and anti-FANCC antibodies. Tubulin (\*) was used as a loading control.

**Table S1. MMC-induced chromosomal aberrations in normal cells transfected with nontarget (Nt) siRNA and FA-A cells transfected with Nt siRNA or  $\mu$ -calpain siRNA**

|                      | MMC<br>(30 nM) | Cells with<br>chromosomal<br>aberrations <sup>a</sup> | Chromosomal aberrations <sup>b</sup> |                     |        | Total<br>chromosomal<br>aberrations <sup>b</sup> |
|----------------------|----------------|-------------------------------------------------------|--------------------------------------|---------------------|--------|--------------------------------------------------|
|                      |                |                                                       | Interchromatid<br>exchanges          | Fusions/<br>radials | Breaks |                                                  |
| Normal +             | -              | 12                                                    | 9                                    | 6                   | 3      | 18                                               |
| Nt siRNA             | +              | 34                                                    | 65                                   | 28                  | 39     | 132                                              |
| FA-A                 | -              | 14                                                    | 15                                   | 5                   | 5      | 25                                               |
|                      | +              | 95                                                    | 401                                  | 97                  | 130    | 628                                              |
| FA-A +               | -              | 16                                                    | 10                                   | 4                   | 7      | 21                                               |
| Nt siRNA             | +              | 92                                                    | 393                                  | 87                  | 118    | 598                                              |
| FA-A +               | -              | 17                                                    | 18                                   | 2                   | 4      | 24                                               |
| $\mu$ -calpain siRNA | +              | 48                                                    | 80                                   | 11                  | 55     | 146                                              |

<sup>a</sup> 100 cells in each group were counted to determine how many cells contained metaphase spreads with chromosomal aberrations (i.e. interchromatid exchanges, fusions/radials and breaks)

<sup>b</sup> Chromosomal aberrations found in metaphase spreads from 100 cells in each group
